# Supplementary material
Source: Research Square preprint supplement (doi:10.21203/rs.3.rs-9839828/v1)
Supplement: Supplementary file 1 [file 8813d5f436c2b024502c2eec.docx]

**Table 1**: Chemical compositions of essential oil from the leaf of *Mezonueron benthamianum*.

Constituents RIcal  RIdb Relative abundance (%)

Hexanal 800 801 0.17

alpha-Thujene 922 924 0.33

2-Methyl-5-isopropenyl furan 930 930 0.38

alpha-Pinene 934 932 2.64

Thujadiene 940 941 0.10

Camphene 949 946 0.35

Thuja-2,4(10)-diene 952 953 0.26

Benzaldehyde 952 954 0.22

beta-Pinene 968 974 0.22

6-Methyl-5-hepten-2-one 980 981 0.30

3-para-Menthene 987 984 0.28

para-Mentha-1(7),8-diene 1004 1003 0.22

cis-para-Menth-8-ene+alpha₋₋

Phellandrene 1019 1026 0.32

para-Cymene 1024 1020 18.82

Limonene 1025 1024 3.99

beta-Phellandrene 1030 1025 0.41

gamma-Terpinene 1054 1054 0.17

cis-Linalool oxide (furanoid) 1061 1067 0.20

para-Cymenene 1089 1089 0.52

Perillene 1102 1102 0.47

Linalool 1104 1095 0.31

n-Nonanal 1106 1100 0.24

trans-Thujone 1113 1112 0.27

cis-beta-Terpineol 1164 1170 0.41

Terpinen-4-ol 1169 1174 0.26

Cryptone + Cymenol 1185 1185 3.12

alpha-Terpineol 1186 1186 0.51

Verbenone 1207 1204 0.24

Cuminal 1235 1238 1.53

Carvone 1243 1239 0.49

Phellandral 1272 1273 1.34

Carvacrol 1298 1298 4.81

alpha-Copaene 1371 1374 0.29

Geranyl acetate 1378 1379 0.20

Hexyl hexanoate 1380 1382 0.50

beta-Elemene 1387 1389 5.28

beta-Caryophyllene 1419 1417 0.24

Geranyl acetone 1452 1453 0.35

trans-beta-Ionone 1489 1487 0.34

beta-Selinene 1490 1489 1.89

alpha-Selinene 1499 1498 0.33

delta-Cadinene 1518 1522 0.37

Isoshyobunone 1579 1575 0.85

alpha-Elemol 1542 1548 0.52

Isocaryophyllene oxide 1583 1582 0.48

cis-Dihydro nerolidol 1544 1545 1.54

trans-Nerolidol 1564 1561 2.98

trans-Dihydro nerolidol 1566 1568 1.14

Spathulenol 1574 1577 2.29

Caryophyllene oxide 1580 1582 9.48

Humulene epoxide II 1600 1608 1.18

iso-Spathulenol 1588 1590 3.14

Pogostol 1659 1651 3.29

Mustakone 1671 1676 0.60

Sesquiterpineol 1685 1687 2.88

Phytone 1842 1841 1.03

Phytol 1942 1942 1.52

Oxygenated sesquiterpenoids 31.71

Monoterpene hydrocarbons 26.37

Oxygenated monoterpenoids 12.8

Sesquiterpene hydrocarbons 9.37

Non-terpenoid derivatives 1.81

Diterpenoid derivatives 2.55

Total Identified (%) 84.61

RIcal = Retention index calculated with respect to a homologous series of *n*-alkanes

RIdb = Retention index from the databases (Adams, 2017).

**Table 2: MIC (*μg/mL*) and MBC (*μg/mL*) of essential oil from *M. benthamianum* leaf**

Strain of bacteria Gram+/- Reference number MIC MBC

*Staphylococcus aureus* + *ATCC 25923* 31.25 125.00

*Bacillus subtilis +* *ATCC 6633* 7.81 31.25

*Micrococcus species + ATCC 700405* 15.63 31.25

*Escherichia coli* ₋₋ATCC 25922 62.50 250.00

*Klebsiella oxytoca* ₋₋ *ATCC 25983* 31.25 125.00

*Pseudomonas aeruginosa* ₋₋ *ATCC 27853* 15.63 125.00

MIC: Minimum Inhibitory Concentration; MBC: Minimum Bactericidal Concentration

**Table 3: MIC (*μg/mL*) and MFC (*μg/mL*) of essential oil from *M. benthamianum* leaf**

Strain of fungi Reference number MIC MFC

*Aspergillus fumigatus*  ATCC 26234 0.00 >1000.00

*Fusarium oxysporum* ATCC 48112 31.25 125.00

*Penicillium notatum* ATCC 20269 125.00 500.00

MFC: Minimum Fungicidal Concentration
